# Supplementary material for: Identification and Characterization of MicroRNAs in Snakehead Fish Cell Line upon Snakehead Fish Vesiculovirus Infection
Source: MDPI journal article supplement (doi:10.3390/ijms17020154), 2016-01-26
Supplement: s1 [file s1]

# Supplementary Materials: Identification and Characterization of MicroRNAs in Snakehead Fish Cell Line upon Snakehead Fish Vesiculovirus Infection

Xiaodan Liu, Jiagang Tu, Junfa Yuan, Xueqin Liu, Lijuan Zhao, Farman Ullah Dawar, Muhammad Nasir Khan Khattak, Abeer M. Hegazy, Nan Chen, Vikram N. Vakharia and Li Lin

**Table S1.** Statistics of the preliminary sequencing of SSN-1 cells with or without SHVV infection.

| Sample                               | Clean Reads | Unique Clean Reads | Aligned * Unique Clean Reads (%) |
|--------------------------------------|-------------|--------------------|----------------------------------|
| SSN-1 cell (3 h)                     | 11,049,428  | 396,669            | 151,939 (38.30%)                 |
| SSN-1 cell infected with SHVV (3 h)  | 9,754,366   | 280,855            | 88,889 (31.64%)                  |
| SSN-1 cell (24 h)                    | 13,125,705  | 340,204            | 131,607 (38.68%)                 |
| SSN-1 cell infected with SHVV (24 h) | 16,815,529  | 1,022,296          | 210,524 (20.59%)                 |

\* The unique clean reads were aligned with the genome of *Danio rerio*.

**Table S2.** Differentially expressed miRNAs ( $p < 0.05$ ) when the sample SSN-1 cell infected with SHVV (3 h) was compared to SSN-1 cell (3 h).

| Name                    | Fold Change ( $\text{Log}_2^{I3/C3}$ )* | $p$ Value              |
|-------------------------|-----------------------------------------|------------------------|
| miR-126a-5p>miR-126b-5p | 1.13966                                 | $2.90 \times 10^{-10}$ |
| miR-135c                | 2.50178                                 | 0.000294               |
| miR-140-5p              | 1.1076                                  | $3.47 \times 10^{-17}$ |
| miR-143                 | 1.18943                                 | $1.70 \times 10^{-9}$  |
| miR-145-5p              | 1.91682                                 | 0.032896               |
| miR-146a                | 1.61184                                 | 0                      |
| miR-153a-3p             | 1.25586                                 | $1.30 \times 10^{-38}$ |
| miR-153c-3p             | 1.09739                                 | $1.32 \times 10^{-8}$  |
| miR-183-5p              | 1.51688                                 | $4.54 \times 10^{-5}$  |
| miR-184                 | 3.17985                                 | 0.012661               |
| miR-7147                | 1.10041                                 | 0.000831               |
| miR-455-5p              | 1.36427                                 | 0.006879               |
| miR-199-5p              | 1.20884                                 | 0                      |
| miR-221-5p              | 1.25024                                 | 0.020809               |
| miR-24                  | 1.03277                                 | $7.36 \times 10^{-51}$ |
| miR-31                  | -1.97543                                | $1.30 \times 10^{-15}$ |
| miR-196d                | -4.06808                                | $6.62 \times 10^{-5}$  |
| miR-203a-3p             | -9.77787                                | $2.35 \times 10^{-27}$ |

\* I3: SSN-1 cell infected with SHVV (3 h); C3: SSN-1 cell (3 h).

**Table S3.** Differentially expressed miRNAs ( $p < 0.05$ ) when the sample SSN-1 cell infected with SHVV (24 h) was compared to SSN-1 cell (24 h).

| Name                | Fold Change ( $\text{Log}_2^{I24/C24}$ )* | $p$ Value               |
|---------------------|-------------------------------------------|-------------------------|
| let-7a              | -3.23603                                  | 0                       |
| let-7b              | -3.14206                                  | 0                       |
| let-7c-3p>let-7d-3p | -4.00125                                  | $1.23 \times 10^{-7}$   |
| let-7c-5p           | -2.58041                                  | $3.58 \times 10^{-133}$ |
| let-7d-5p           | -2.99895                                  | $2.66 \times 10^{-32}$  |
| let-7e              | -3.35087                                  | 0                       |

Table S3. Cont.

| Name                    | Fold Change (Log <sub>2</sub> <sup>I24/C24</sup> )* | p Value                 |
|-------------------------|-----------------------------------------------------|-------------------------|
| let-7f                  | −3.29203                                            | 0                       |
| let-7g                  | −2.732                                              | 0                       |
| let-7h                  | −2.51911                                            | 0                       |
| let-7i                  | −2.29029                                            | $9.44 \times 10^{-99}$  |
| let-7j                  | −3.0519                                             | 0                       |
| miR-100-3p              | −3.61793                                            | $1.18 \times 10^{-163}$ |
| miR-100-5p              | −5.84746                                            | 0                       |
| miR-101a                | −3.05599                                            | $6.30 \times 10^{-237}$ |
| miR-101b                | −2.73747                                            | 0                       |
| miR-103                 | −2.61915                                            | $8.57 \times 10^{-304}$ |
| miR-107a-3p             | −2.81985                                            | $1.02 \times 10^{-221}$ |
| miR-10a-3p              | −4.60532                                            | $5.79 \times 10^{-12}$  |
| miR-10a-5p              | −2.1018                                             | 0                       |
| miR-10b-2-3p            | −3.94807                                            | $1.89 \times 10^{-65}$  |
| miR-10b-5p              | −2.39311                                            | 0                       |
| miR-10d-5p              | −2.63848                                            | 0                       |
| miR-125a                | −3.16476                                            | $1.38 \times 10^{-33}$  |
| miR-125b-2-3p           | −5.51039                                            | 0                       |
| miR-125b-5p             | −3.43276                                            | 0                       |
| miR-125c-5p             | −5.07926                                            | $4.37 \times 10^{-284}$ |
| miR-126a-3p             | −4.2054                                             | $1.78 \times 10^{-20}$  |
| miR-126a-5p>miR-126b-5p | −2.66274                                            | $1.47 \times 10^{-31}$  |
| miR-128-3p              | −4.92859                                            | 0                       |
| miR-1306                | −3.21539                                            | $1.84 \times 10^{-7}$   |
| miR-130a                | −3.11229                                            | 0                       |
| miR-130c-3p             | −3.38263                                            | 0                       |
| miR-130c-5p             | −4.79246                                            | $6.23 \times 10^{-120}$ |
| miR-132-3p              | −3.89345                                            | $1.75 \times 10^{-30}$  |
| miR-135c                | −1.6469                                             | 0.002498916             |
| miR-138-5p              | −4.94236                                            | $1.53 \times 10^{-29}$  |
| miR-1388-3p             | −2.04562                                            | $2.08 \times 10^{-126}$ |
| miR-140-3p              | −3.03951                                            | 0                       |
| miR-140-5p              | −3.46115                                            | $2.52 \times 10^{-112}$ |
| miR-143                 | −3.5958                                             | $7.15 \times 10^{-37}$  |
| miR-145-3p              | −6.05784                                            | $6.42 \times 10^{-18}$  |
| miR-145-5p              | −7.017                                              | $7.15 \times 10^{-7}$   |
| miR-146a                | −1.98658                                            | 0                       |
| miR-146b                | −3.91539                                            | $9.52 \times 10^{-55}$  |
| miR-148                 | −3.23654                                            | $6.54 \times 10^{-111}$ |
| miR-150                 | −2.63751                                            | $3.77 \times 10^{-13}$  |
| miR-153a-3p             | −2.95278                                            | $6.56 \times 10^{-163}$ |
| miR-153b-3p             | −2.41897                                            | $3.60 \times 10^{-57}$  |
| miR-153b-5p             | −3.67933                                            | $6.62 \times 10^{-11}$  |
| miR-153c-3p             | −2.27796                                            | $1.80 \times 10^{-24}$  |
| miR-15a-5p              | −4.25559                                            | 0                       |
| miR-15b-5p              | −3.87608                                            | 0                       |
| miR-16a                 | −4.02428                                            | 0                       |
| miR-16b                 | −2.99958                                            | 0                       |

Table S3. Cont.

| Name         | Fold Change (Log <sub>2</sub> <sup>I24/C24</sup> )* | p Value                 |
|--------------|-----------------------------------------------------|-------------------------|
| miR-16c-5p   | −1.91909                                            | 0                       |
| miR-17a-2-3p | −3.23186                                            | $5.89 \times 10^{-6}$   |
| miR-17a-3p   | −3.16475                                            | $1.29 \times 10^{-11}$  |
| miR-17a-5p   | −3.15537                                            | 0                       |
| miR-181a-3p  | −3.1716                                             | 0                       |
| miR-181a-5p  | −1.97076                                            | 0                       |
| miR-181b-5p  | −1.75554                                            | 0                       |
| miR-181c-3p  | −5.01275                                            | $1.17 \times 10^{-38}$  |
| miR-181c-5p  | −1.84696                                            | $3.98 \times 10^{-70}$  |
| miR-183-5p   | −1.57979                                            | 0.000204525             |
| miR-184      | −2.16476                                            | 0.004007859             |
| miR-18a      | −3.26618                                            | $1.23 \times 10^{-83}$  |
| miR-192      | −4.12293                                            | $1.60 \times 10^{-72}$  |
| miR-193a-3p  | −4.76167                                            | 0                       |
| miR-196a-5p  | −2.96858                                            | 0                       |
| miR-199-3-3p | −3.81683                                            | $1.38 \times 10^{-74}$  |
| miR-199-3p   | −2.97786                                            | 0                       |
| miR-199-5p   | −3.96545                                            | 0                       |
| miR-19a-3p   | −1.85964                                            | 0                       |
| miR-19b-3p   | −2.03149                                            | 0                       |
| miR-19b-5p   | −7.73689                                            | $8.22 \times 10^{-11}$  |
| miR-19c-3p   | −3.0051                                             | $3.09 \times 10^{-57}$  |
| miR-19d-3p   | −2.12699                                            | 0                       |
| miR-204-5p   | −3.14817                                            | $1.68 \times 10^{-144}$ |
| miR-205-5p   | −3.74971                                            | $2.46 \times 10^{-6}$   |
| miR-20a-5p   | −3.19422                                            | 0                       |
| miR-21       | −3.39804                                            | 0                       |
| miR-210-3p   | −3.67693                                            | 0                       |
| miR-210-5p   | −5.51449                                            | 0.006223011             |
| miR-212      | −2.62749                                            | $1.63 \times 10^{-15}$  |
| miR-214      | −4.27387                                            | $8.54 \times 10^{-123}$ |
| miR-216b     | −6.73689                                            | $8.49 \times 10^{-6}$   |
| miR-221-3p   | −2.48955                                            | 0                       |
| miR-221-5p   | −5.56686                                            | $1.10 \times 10^{-12}$  |
| miR-222a-3p  | −3.55456                                            | 0                       |
| miR-222a-5p  | −2.8953                                             | 0                       |
| miR-22a-3p   | −3.09154                                            | 0                       |
| miR-22a-5p   | −3.04137                                            | $7.28 \times 10^{-80}$  |
| miR-22b-3p   | −4.02414                                            | 0                       |
| miR-22b-5p   | −2.84283                                            | $1.22 \times 10^{-27}$  |
| miR-23a-3-5p | −7.92953                                            | $3.04 \times 10^{-12}$  |
| miR-23a-3p   | −2.13028                                            | 0                       |
| miR-23a-5p   | −6.09946                                            | 0.000524275             |
| miR-23b      | −2.73405                                            | $4.47 \times 10^{-250}$ |
| miR-24       | −3.40993                                            | 0                       |
| miR-25-3p    | −2.31239                                            | 0                       |
| miR-26a-2-3p | −3.8599                                             | $9.31 \times 10^{-10}$  |
| miR-26a-5p   | −3.35436                                            | 0                       |

Table S3. Cont.

| Name        | Fold Change (Log <sub>2</sub> <sup>I24/C24</sup> )* | p Value                 |
|-------------|-----------------------------------------------------|-------------------------|
| miR-26b     | −3.6547                                             | 0                       |
| miR-27a-3p  | −2.4537                                             | 0                       |
| miR-27b-3p  | −3.29876                                            | 0                       |
| miR-27b-5p  | −3.24885                                            | $1.49 \times 10^{-189}$ |
| miR-27c-3p  | −2.77851                                            | 0                       |
| miR-27d     | −3.95566                                            | $4.61 \times 10^{-29}$  |
| miR-27e     | −4.40179                                            | $2.76 \times 10^{-10}$  |
| miR-29a     | −3.25812                                            | 0                       |
| miR-29b     | −3.20471                                            | $1.75 \times 10^{-178}$ |
| miR-301a    | −2.1425                                             | $2.71 \times 10^{-27}$  |
| miR-301b-3p | −4.92954                                            | 0.032381332             |
| miR-301c-3p | −2.45693                                            | $4.21 \times 10^{-6}$   |
| miR-30b     | −3.714                                              | 0                       |
| miR-30c-5p  | −2.58964                                            | $3.93 \times 10^{-59}$  |
| miR-30d     | −3.15037                                            | 0                       |
| miR-30e-3p  | −3.06374                                            | 0                       |
| miR-30e-5p  | −3.38238                                            | 0                       |
| miR-31      | −2.45693                                            | $4.21 \times 10^{-6}$   |
| miR-338     | −4.16476                                            | $8.00 \times 10^{-5}$   |
| miR-34a     | −2.5756                                             | 0                       |
| miR-363-3p  | −3.26429                                            | 0.000196783             |
| miR-365     | −4.92954                                            | 0.032381332             |
| miR-375     | −3.3029                                             | 0                       |
| miR-429a    | −2.44487                                            | 0.000616735             |
| miR-454b    | −2.98676                                            | $5.94 \times 10^{-21}$  |
| miR-455-5p  | −2.3574                                             | 0.000266601             |
| miR-456     | −3.03714                                            | $1.36 \times 10^{-70}$  |
| miR-457a    | −3.01561                                            | $1.53 \times 10^{-21}$  |
| miR-462     | −2.53661                                            | $7.36 \times 10^{-231}$ |
| miR-499-3p  | −5.25146                                            | 0.014195401             |
| miR-7147    | −4.7948                                             | $4.43 \times 10^{-20}$  |
| miR-722     | −6.25146                                            | 0.000229833             |
| miR-724     | −2.63081                                            | $2.42 \times 10^{-106}$ |
| miR-730     | −4.60532                                            | $5.79 \times 10^{-12}$  |
| miR-731     | −3.18425                                            | $3.20 \times 10^{-188}$ |
| miR-737-5p  | −3.65232                                            | 0                       |
| miR-9-4-3p  | −4.65508                                            | $4.74 \times 10^{-18}$  |
| miR-9-5p    | −1.54182                                            | 0.002096158             |
| miR-92a-3p  | −3.97976                                            | 0                       |
| miR-92b-3p  | −4.75081                                            | 0                       |
| miR-99      | −4.71935                                            | $4.02 \times 10^{-283}$ |

\* I24: SSN-1 cell infected with SHVV (24 h); C24: SSN-1 cell (24 h).

**Table S4.** Summary of targeted virus gene prediction of the differentially expressed miRNAs when the sample SSN-1 cell infected with SHVV (3 h) was compared to SSN-1 cell (3 h).

| Name        | Sequence (5'→3')        | Target | Fold Change ( $\log_2^{I3/C3}$ )* |
|-------------|-------------------------|--------|-----------------------------------|
| miR-199-5p  | CCCAGUGUUCAGACUACCUGUUC | N, L   | 1.20884                           |
| miR-135c    | UAUGGCUUUCUAUCCUAUGUG   | M      | 2.50178                           |
| miR-7147    | UGUACCAUGCUGGUAGCCAGU   | G      | 1.10041                           |
| miR-145-5p  | GUCCAGUUUCCCAGGAAUCCC   | G      | 1.91682                           |
| miR-184     | UGGACGGAGAACUGAUAAAGGGC | G      | 3.17985                           |
| miR-153a-3p | UUGCAUAGUCACAAAAGUGAUC  | G, L   | 1.25586                           |
| miR-146a    | UGAGAACUGAAUCCAUAGAUGG  | L      | 1.61184                           |
| miR-153c-3p | UUGCAUAGUCACAAAAAUGAUC  | L      | 1.09739                           |
| miR-183-5p  | UAUGGCACUGGUAGAAUUCACUG | L      | 1.51688                           |
| miR-203a-3p | GUGAAAUGUUUAGGACCACUUG  | L      | -9.77787                          |

\* I3: SSN-1 cell infected with SHVV (3 h), C3: SSN-1 cell (3 h). N: nucleoprotein; P: phosphoprotein; M: matrix protein; G: glycoprotein; L: RNA-dependent RNA polymerase protein (large protein).

**Table S5.** Primers sequences for RT-PCR and qRT-PCR.

| Name           | RT Primers<br>(5'-3')               | qRT-PCR<br>Forward primers (5'-3') | qRT-PCR<br>Reverse primers (5'-3') |
|----------------|-------------------------------------|------------------------------------|------------------------------------|
| miR-135c       | Unique Oligo-dT<br>Adaptor primer * | TATGGCTTTCTATTCCTATGTG             | Universal primer *                 |
| miR-140-5p     | As above                            | CAGTGGTTTTACCCTATGGTAG             | As above                           |
| miR-153a-3p    | As above                            | TTGCATAGTCACAAAAGTGATC             | As above                           |
| miR-153c-3p    | As above                            | TTGCATAGTCACAAAATGATC              | As above                           |
| miR-24         | As above                            | TGGCTCAGTTCAGCAGGAACAG             | As above                           |
| 5S rRNA        | Oligo-dT primer<br>and Random 6     | GGAGACCGCCTGGAATA                  | As above                           |
| N              | As above                            | CCGCATCGGAAATCAAGCAG               | GTTGACCGCTTGCCCAATTT               |
| P              | As above                            | ACAGCTATCCTCAAGCCGTG               | ACAGCACCATTGCTGAACC                |
| $\beta$ -actin | As above                            | CACTGTGCCCCTCTACGAG                | CCATCTCCTGCTCGAAGTC                |

\*: provided from All-in-One™ miRNA qRT-PCR Detection Kit.
